# Supplementary material
Source: PubMed Central journal article supplement (PMC9732866)
Supplement: NIHMS1849550-supplement-Appendix.pdf [file NIHMS1849550-supplement-Appendix.pdf]

## APPENDIX

### | Conditioning of Standard MUSE Model

The effect of additional phase on aliased voxels for an even-odd line decomposition in the MUSE model is:

$$\begin{bmatrix} Y_{er1} \\ Y_{or1} \end{bmatrix} = \begin{bmatrix} 1 & 1 \\ 1 & -1 \end{bmatrix} \begin{bmatrix} P_{r1} & 0 \\ 0 & P_{r2} \end{bmatrix} \begin{bmatrix} M_{r1} \\ M_{r2} \end{bmatrix} = \begin{bmatrix} P_{r1} & P_{r2} \\ P_{r1} & -P_{r2} \end{bmatrix} \begin{bmatrix} M_{r1} \\ M_{r2} \end{bmatrix} \quad (\text{A1})$$

The system in Equation A1 can be factored into two orthogonal matrices and has non-zero determinant  $\forall P_{r1}, P_{r2}$ . This implies the even-odd line reconstruction of MUSE cannot be singular.

Incorporating coil sensitivities into Equation A1 gives:

$$\begin{bmatrix} Y_{er1} \\ Y_{or1} \end{bmatrix} = A_{\text{MUSE ss}} \begin{bmatrix} M_{r1} \\ M_{r2} \end{bmatrix} = \begin{bmatrix} C_{r1} P_{r1} & C_{r2} P_{r2} \\ C_{r1} P_{r1} & -C_{r2} P_{r2} \end{bmatrix} \begin{bmatrix} M_{r1} \\ M_{r2} \end{bmatrix} \quad (\text{A2})$$

The information matrix of  $A_{\text{MUSE ss}}$  is:

$$(A_{\text{MUSE ss}})^H A_{\text{MUSE ss}} = \begin{bmatrix} 2C_{r1}^H C_{r1} & 0 \\ 0 & 2C_{r2}^H C_{r2} \end{bmatrix} \quad (\text{A3})$$

From Equation A3, the conditioning of the even-odd line combination using a MUSE system is invariant to  $P$ .

### | Calculation of Single-Shot non-CPMG Information Matrix

Intermediate steps for calculation of  $(A_{\text{non-CPMG ss}})^H A_{\text{non-CPMG ss}}$  are as follows:

$$(A_{\text{non-CPMG ss}})^H A_{\text{non-CPMG ss}} = \begin{bmatrix} C_{r1}^H P_{r1}^* & C_{r1}^H P_{r1} \\ C_{r2}^H P_{r2}^* & -C_{r2}^H P_{r2} \end{bmatrix} \begin{bmatrix} C_{r1} P_{r1} & C_{r2} P_{r2} \\ C_{r1} P_{r1}^* & -C_{r2} P_{r2}^* \end{bmatrix} \quad (\text{A4})$$

$$(A_{\text{non-CPMG ss}})^H A_{\text{non-CPMG ss}} = \begin{bmatrix} 2C_{r1}^H C_{r1} & C_{r1}^H C_{r2} (P_{r1}^* P_{r2} - P_{r1} P_{r2}^*) \\ C_{r2}^H C_{r1} (P_{r1} P_{r2}^* - P_{r1}^* P_{r2}) & 2C_{r2}^H C_{r2} \end{bmatrix} \quad (\text{A5})$$

Equation 10 can be obtained from Equation A5 by applying Euler's identity and angle-sum formulas.

## | Calculation of SENSE Information Matrix

A conventional  $R = 2$  SENSE system of equations is:

$$\begin{bmatrix} Y_{1\dots N_c} \end{bmatrix} = A_{SENSE} \begin{bmatrix} M_{r_1} \\ M_{r_2} \end{bmatrix} = \begin{bmatrix} C_{r_1} & C_{r_2} \end{bmatrix} \begin{bmatrix} M_{r_1} \\ M_{r_2} \end{bmatrix} \quad (\text{A6})$$

To obtain the singular values of  $A_{SENSE} \in \mathbb{C}^{N_c \times 2}$ , we must calculate  $(A_{SENSE})^H A_{SENSE}$ :

$$(A_{SENSE})^H A_{SENSE} = \begin{bmatrix} C_{r_1}^H C_{r_1} & C_{r_1}^H C_{r_2} \\ C_{r_2}^H C_{r_1} & C_{r_2}^H C_{r_2} \end{bmatrix} \quad (\text{A7})$$

The characteristic polynomial of  $(A_{SENSE})^H A_{SENSE}$  is:

$$\det((A_{SENSE})^H A_{SENSE} - \lambda I) = (C_{r_1}^H C_{r_1} - \lambda)(C_{r_2}^H C_{r_2} - \lambda) - (C_{r_1}^H C_{r_2})(C_{r_2}^H C_{r_1}) \quad (\text{A8})$$

Equation A8 is equal to the characteristic polynomial of the information matrix in Equation 12.

## | Eigenvalues of a $2 \times 2$ Information Matrix

The information matrix has an  $A^H A$  decomposition and is therefore positive semi-definite with Hermitian symmetry. For a  $2 \times 2$  information matrix:

$$A^H A = \begin{bmatrix} a & b \\ b^* & c \end{bmatrix} \succeq 0, \quad (\text{A9})$$

the eigenvalues are non-negative, given by:

$$\lambda_1 = \frac{(a + c) + \sqrt{(a + c)^2 - 4ac + 4|b|^2}}{2} \quad (\text{A10})$$

$$\lambda_2 = \frac{(a + c) - \sqrt{(a + c)^2 - 4ac + 4|b|^2}}{2} \quad (\text{A11})$$

The condition number increases with the magnitude of the off-diagonal term  $|b|$  if  $a$  and  $c$  are constant. Relating to Equation A7,  $a$  and  $c$  constant assumes that the sum-of-squares over the coil dimension at voxels  $r_1$  and  $r_2$  is constant but the coupling  $|b|$  between coils varies.
